# Supplementary material for: Chemopreventive Effect of an In Vitro Digested and Fermented Plant Sterol-Enriched Wholemeal Rye Bread in Colon Cancer Cells
Source: MDPI journal article supplement (doi:10.3390/foods13010112), 2023-12-28
Supplement: s1 [file s1]

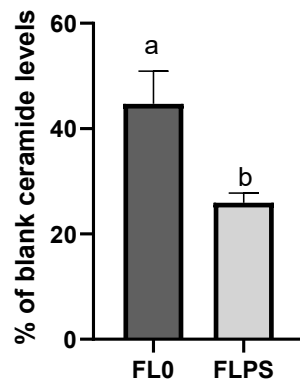

**Supplementary Figure S1.** Levels of ceramide in Caco-2 after 24 h of treatment with samples (1/5 dilution). Data are shown as mean  $\pm$  standard deviation ( $n = 3$ ). Different letters (a-b) show statistically significant differences between FL0 and FLPS ( $p < 0.05$ ). FL0: fermentation liquid without plant sterols; FLPS: fermentation liquid with plant sterols. Respective blanks are stabilization blank for FL0 and wash blank for FLPS.

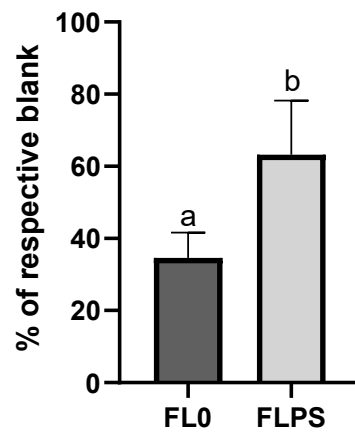

**Supplementary Figure S2.** Levels of reactive oxygen species (ROS) in Caco-2 after 24 h of treatment with samples (1/5 dilution). Data are shown as mean  $\pm$  standard deviation ( $n = 3$ ). Different letters (a-b) show statistically significant differences between FL0 and FLPS ( $p < 0.05$ ). FL0: fermentation liquid without plant sterols; FLPS: fermentation liquid with plant sterols. Respective blanks are stabilization blank for FL0 and wash blank for FLPS.
